# Supplementary material for: Identification of Carotenoids in Hairless Canary Seed and the Effect of Baking on Their Composition in Bread and Muffin Products
Source: MDPI journal article supplement (doi:10.3390/molecules27041307), 2022-02-15
Supplement: s1 [file s1]

### Supplementary Figure S1

Appearance of muffin and bread products. C, corn; HCS, hairless canary seed and W, wheat.

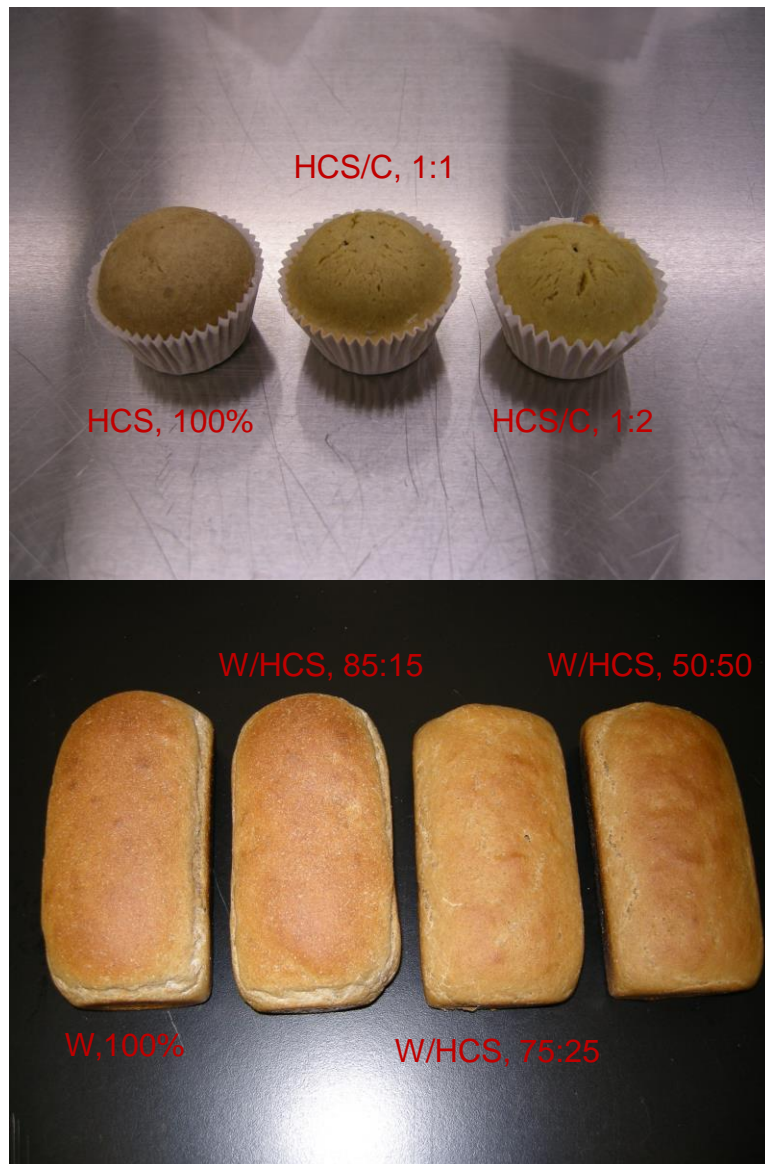

## Supplementary Figure S2

MS spectra of (A) lutein-3-*O*-palmitate in ESI mode, (B) lutein-3'-*O*-palmitate in ESI mode (C) lutein-3-*O*-palmitate in APCI mode, (D) lutein-3'-*O*-palmitate in APCI mode. \*major non-carotenoid peaks

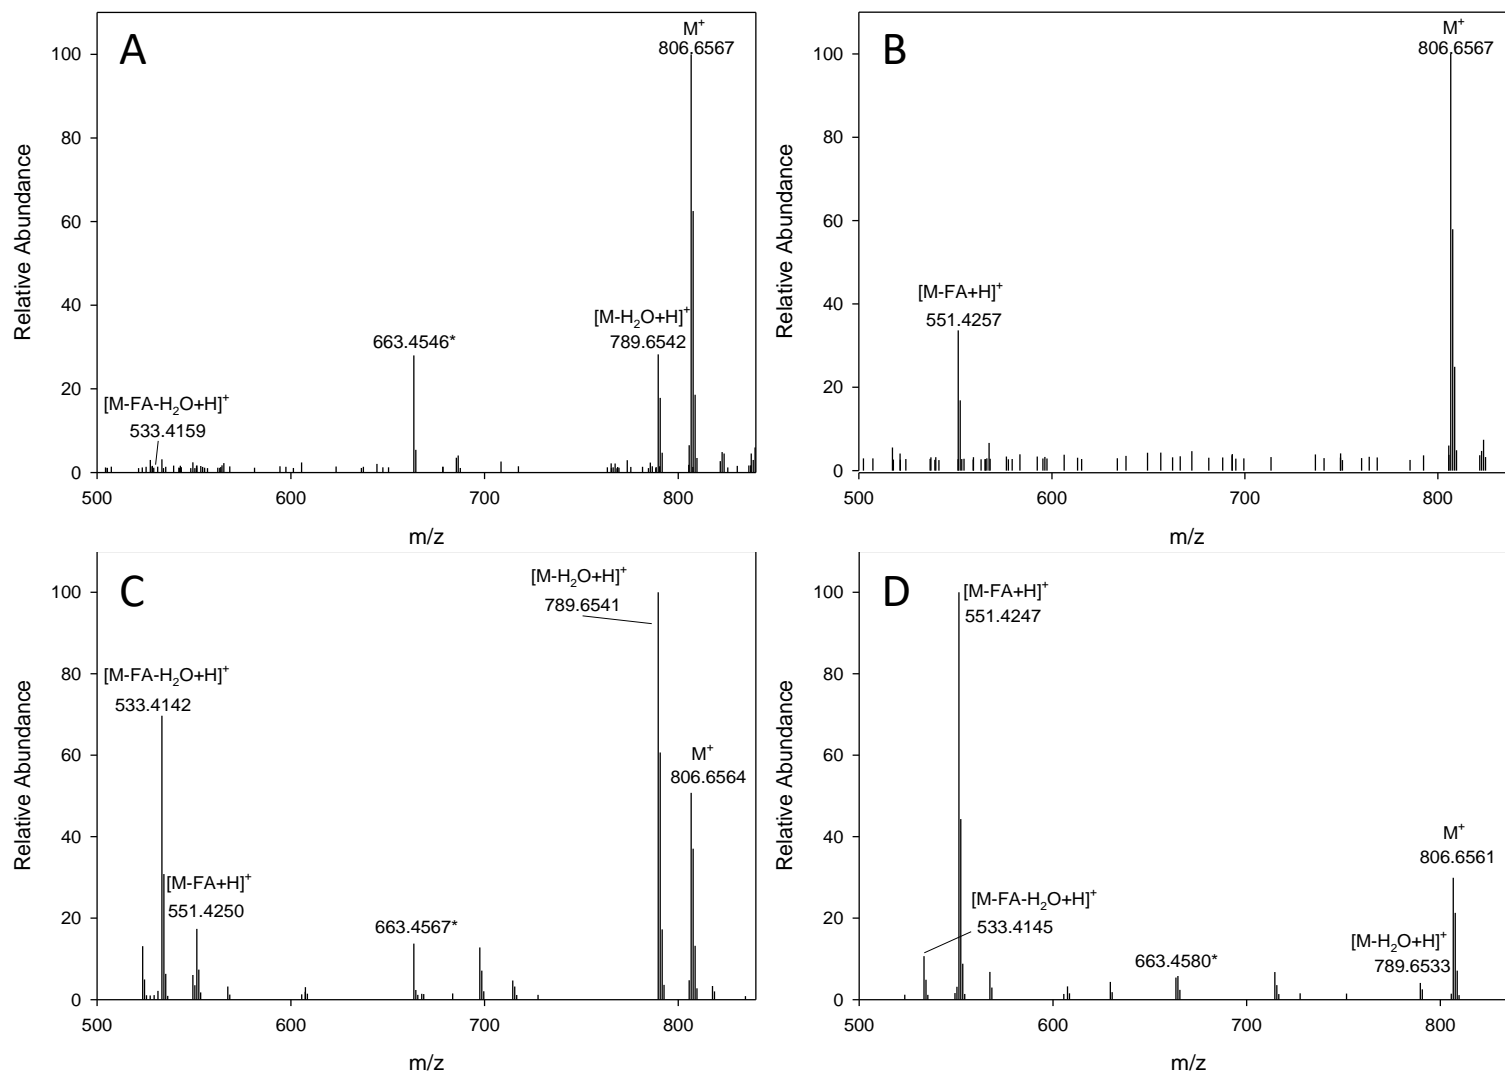

## Supplementary Table S1

### Quality and nutrient content of muffin products

| Attribute                                 | Hairless canary seed<br>(100%) | Hairless canary seed/corn blend<br>(1:1, w/w) | Hairless canary seed/corn blend<br>(1:2, w/w) |
|-------------------------------------------|--------------------------------|-----------------------------------------------|-----------------------------------------------|
| Height (cm)                               | 3.5 ±0.09                      | 3.3 ±0.07                                     | 3.0 ±0.09                                     |
| Internal quality score<br>(5-point scale) | 3.6 ±0.13                      | 3.9 ±0.17                                     | 4.1 ±0.18                                     |
| External quality score<br>(5-point scale) | 4.6 ±0.12                      | 4.7 ±0.14                                     | 4.9 ±0.14                                     |
| Moisture (% , wb)                         | 27.5 ±0.57                     | 28.5 ±0.35                                    | 28.9 ±0.53                                    |
| Protein (% , db)                          | 17.9 ±0.12                     | 11.0 ±0.49                                    | 9.2 ±0.16                                     |
| TDF (% , db)                              | 12.8 ±0.63                     | 8.4 ±0.38                                     | 7.8 ±0.12                                     |
| Fat (% , db)                              | 5.7 ±0.21                      | 4.5 ±0.21                                     | 3.8 ±0.15                                     |
| Ash (% , db)                              | 3.3 ±0.05                      | 2.5 ±0.06                                     | 2.3 ±0.05                                     |

**Supplementary Table S2****Quality and nutrient content of bread products**

| Attribute                                  | Wheat<br>(100%) | Wheat/Hairless canary seed<br>(85/15, w/w) | Wheat/Hairless canary seed<br>(75/25, w/w) | Wheat/Hairless canary seed<br>(50/50, w/w) |
|--------------------------------------------|-----------------|--------------------------------------------|--------------------------------------------|--------------------------------------------|
| Loaf volume (cm <sup>3</sup> )             | 455 ±19         | 428 ±15                                    | 395 ±12                                    | 308 ±11                                    |
| Internal quality score<br>(10-point scale) | 7.2 ±0.28       | 6.3 ±0.21                                  | 6.2 ±0.22                                  | 4.0 ±0.18                                  |
| External quality score<br>(10-point scale) | 7.5 ±0.25       | 6.9 ±0.19                                  | 6.8 ±0.19                                  | 4.1 ±0.17                                  |
| Moisture (% , wb)                          | 35.1 ±0.76      | 35.5 ±0.62                                 | 36.3 ±0.97                                 | 35.0 ±1.03                                 |
| Protein (% , db)                           | 18.4 ±0.44      | 20.4 ±0.31                                 | 20.6 ±0.55                                 | 21.7 ±0.69                                 |
| TDF (% , db)                               | 11.5 ±0.39      | 11.9 ±0.53                                 | 12.3 ±0.49                                 | 12.6 ±0.47                                 |
| Fat (% , db)                               | 2.5 ±0.09       | 2.8 ±0.10                                  | 3.6 ±0.15                                  | 4.2 ±0.13                                  |
| Ash (% , db)                               | 3.2 ±0.08       | 3.3 ±0.06                                  | 3.4 ±0.07                                  | 3.5 ±0.09                                  |
